# Supplementary material for: Oral Rabies Vaccination of Small Indian Mongooses (Urva auropunctata) with ONRAB via Ultralite Baits
Source: MDPI journal article supplement (doi:10.3390/v13050734), 2021-04-23
Supplement: s1 [file s1]

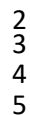

Figure S1: Geometric mean RVNA titers from mongooses offered ~1.8 mL 10<sup>9.5</sup>/mL TCID<sub>50</sub> ONRAB oral rabies vaccine by bait (this study) versus DIOC [10] on day 14 pv.

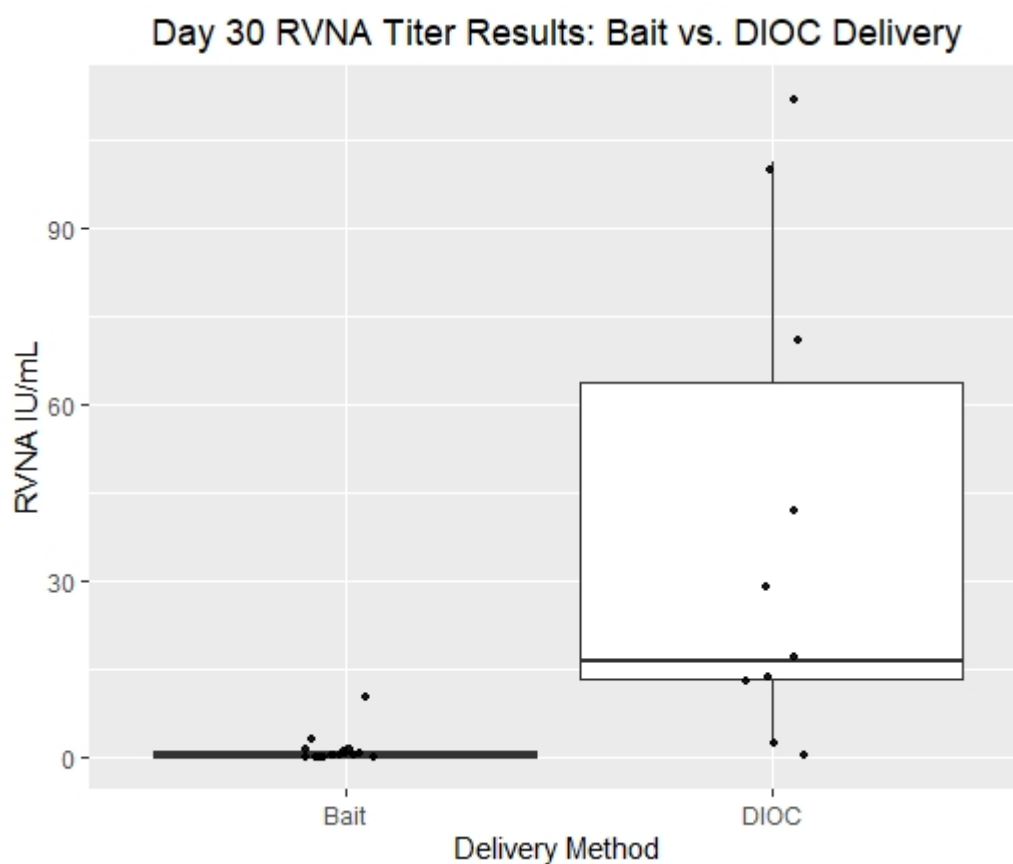

Figure S2: Geometric mean RVNA titers from mongooses offered ~1.8 mL  $10^{9.5}$ /mL TCID<sub>50</sub> ONRAB oral rabies vaccine by bait (this study) versus DIOC [10] on day 30 pv.

6  
7  
8  
9
